# Supplementary material for: Transcriptome and proteome analyses reveal the virulence of the Vibrio alginolyticus effector gene vopR
Source: Royal Society of Chemistry journal article supplement (doi:10.1039/d5mo00010f), 2025-04-25
Supplement: d5mo00010f1.pdf [file d5mo00010f1.pdf]

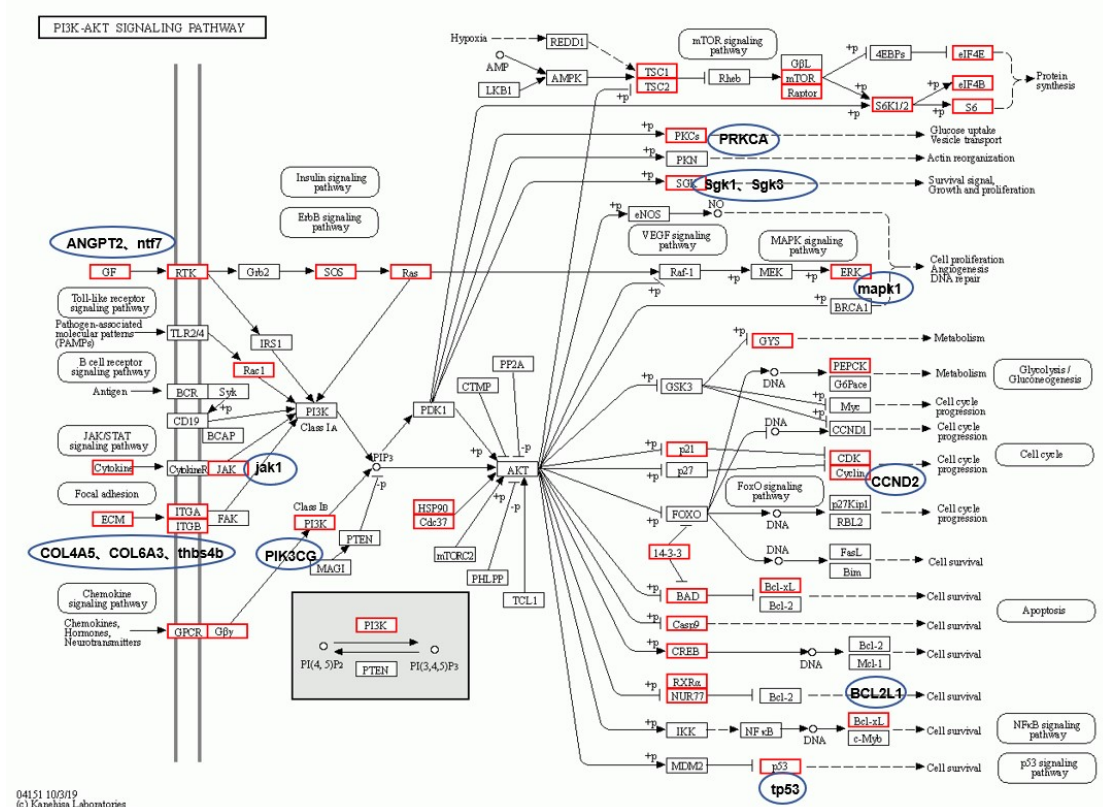

**Supplementary 1.** Differentially expressed genes after overexpression of vopR are involved in PI3K -AKT signaling pathway.

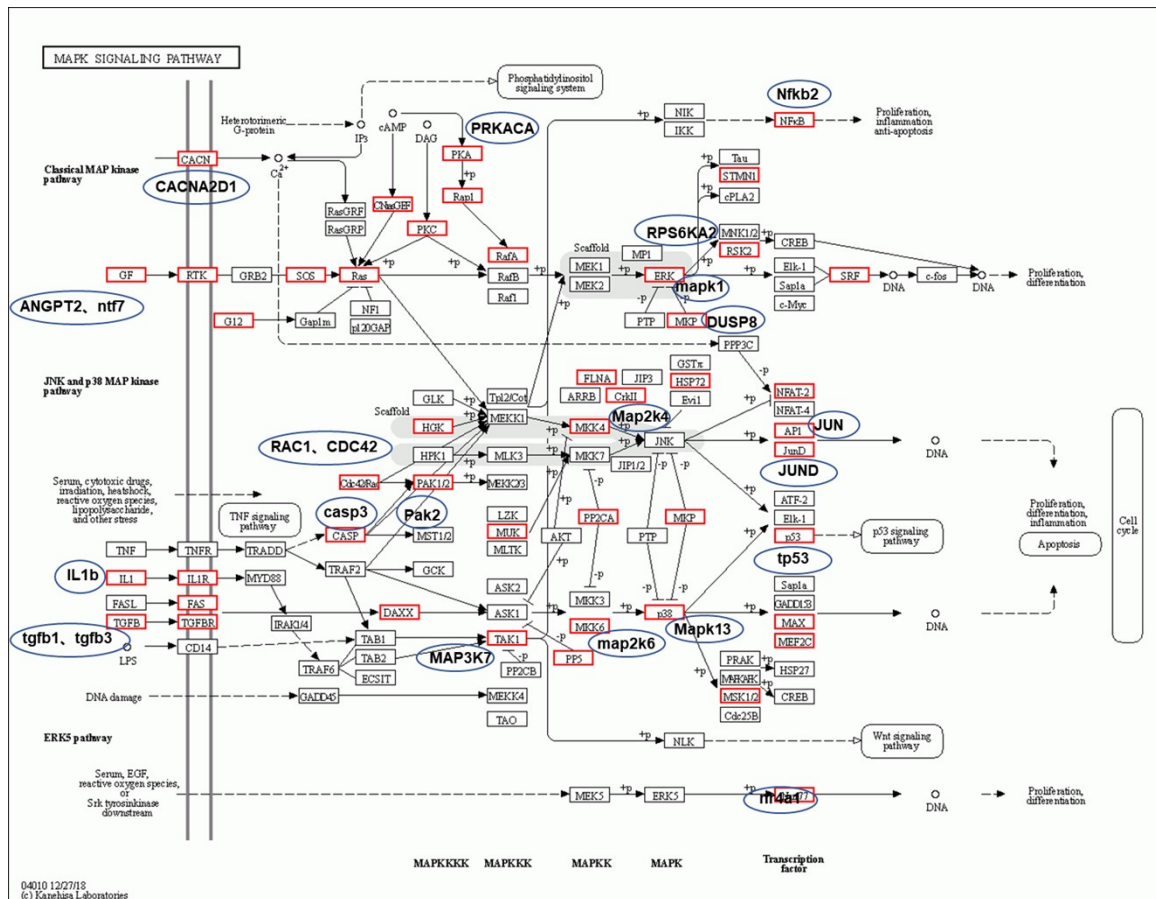

**Supplementary 2.** Differentially expressed genes after overexpression of vopR are involved in MAPK signaling pathway.
